# Supplementary material for: Biofilm formation is not associated with worse outcome in Acinetobacter baumannii bacteraemic pneumonia
Source: PubMed Central journal article supplement (PMC5940913; doi:10.1038/s41598-018-25661-9), 2018-05-08

**Title: Biofilm formation is not associated with worse outcome in *Acinetobacter baumannii* bacteraemic pneumonia**

Yung-Chih Wang,<sup>1,2</sup> Tzu-Wen Huang,<sup>3,4</sup> Ya-Sung Yang,<sup>1</sup> Shu-Chen Kuo,<sup>5</sup> Chung-Ting Chen,<sup>6</sup> Chang-Pan Liu,<sup>7,8</sup> Yuag-Meng Liu,<sup>9</sup> Te-Li Chen,<sup>10,11</sup> Feng-Yee Chang,<sup>1</sup> Shih-Hsiung Wu,<sup>12</sup> Chorng-Kuang How,<sup>6,13</sup> Yi-Tzu Lee.<sup>6,13,\*</sup>

**Supplementary information**

**Supplementary Table S1. Use of antimicrobials and the 28-day mortality rates in patients with bacteraemic pneumonia caused by non-biofilm-forming *Acinetobacter baumannii*.**

| Main agents used                                     | APACHE II score, |                              | Patients, no. (%)                 |                                   |                      |                  |
|------------------------------------------------------|------------------|------------------------------|-----------------------------------|-----------------------------------|----------------------|------------------|
|                                                      | Patients, no.    | Median (interquartile range) | Appropriate antimicrobial therapy | Combination antimicrobial therapy | 28-Day non-survivors | 28-Day survivors |
| Anti-pseudomonal penicillins <sup>a</sup>            | 24               | 25.46 (19.25–30)             | 11 (45.8)                         | 4 (16.7)                          | 14 (58.3)            | 10 (41.7)        |
| Anti-pseudomonal cephalosporins <sup>b</sup>         | 29               | 26.62 (21-33)                | 4 (13.8)                          | 9 (31)                            | 15 (51.7)            | 14 (48.3)        |
| Anti-pseudomonal fluoroquinolones <sup>c</sup>       | 8                | 29.25 (16.5-39.75)           | 1 (12.5)                          | 3 (37.5)                          | 4 (50)               | 4 (50)           |
| Anti-pseudomonal carbapenems <sup>d</sup>            | 65               | 26.63 (21.5-32)              | 19 (29.2)                         | 14 (21.5)                         | 37 (56.9)            | 28 (43.1)        |
| Ampicillin/sulbactam or sulbactam                    | 19               | 28.16 (22-39)                | 6 (31.6)                          | 10 (52.6)                         | 11 (57.9)            | 8 (42.1)         |
| Non-antipseudomonal $\beta$ -lactamases <sup>e</sup> | 20               | 29.2 (19-38.75)              | 8 (40)                            | 1 (5)                             | 11 (55)              | 9 (45)           |

\* Data are the median (interquartile range) for continuous variables and number of cases (%) for categorical variables. APACHE II = Acute Physiologic and Chronic Health Evaluation II.

<sup>a</sup>piperacillin, piperacillin/tazobactam, and ticarcillin/clavulanate.

<sup>b</sup>cefoperazone, ceftazidime, cefepime, and ceftazidime/ceftazidime.

<sup>c</sup>ciprofloxacin and levofloxacin.

<sup>d</sup>imipenem and meropenem.

<sup>e</sup>penicillin, amoxicillin/clavulanate, ceftazidime, cefuroxime, cefotaxime, cefmetazole, and flomoxef.

**Supplementary Table S2. The minimum inhibitory concentration (MIC) and minimum biofilm eradication concentration (MBEC) of imipenem and meropenem against 10 *Acinetobacter baumannii* isolates.**

| Drugs   |           | Imipenem   |             | Meropenem  |             |
|---------|-----------|------------|-------------|------------|-------------|
| Strains | Pulsotype | MIC (mg/L) | MBEC (mg/L) | MIC (mg/L) | MBEC (mg/L) |
| 13      | P4        | 64         | >2048       | 128        | >2048       |
| 41      | P5        | 4          | >2048       | 2          | >2048       |
| 93      | P11       | 8          | >2048       | 16         | >2048       |
| 99      | P14       | 64         | >2048       | 64         | >2048       |
| 102     | P15       | 16         | >2048       | 32         | >2048       |
| 137     | P31       | 0.25       | >1024       | 0.25       | >1024       |
| 146     | P36       | 0.5        | >1024       | 0.25       | >1024       |
| 156     | P43       | 64         | >2048       | 0.25       | >1024       |
| 177     | P60       | 1          | 1024        | 4          | >2048       |
| 190     | P68       | 4          | >2048       | 32         | >2048       |

\* Values represent the mode of at least 3 biological replicates.

**Supplementary Table S3. Biofilm-associated genes of selected *Acinetobacter baumannii* isolates.**

| Isolates                            | Pulsotype | <i>BfmS</i> | <i>AbaI</i> | <i>Bap1</i> | <i>Bap2</i> | <i>pgaABCD</i> | <i>CsuAB/ABCDE</i> |             |             |             |             |               |
|-------------------------------------|-----------|-------------|-------------|-------------|-------------|----------------|--------------------|-------------|-------------|-------------|-------------|---------------|
|                                     |           |             |             |             |             |                | <i>CsuA</i>        | <i>CsuB</i> | <i>CsuC</i> | <i>CsuD</i> | <i>CsuE</i> | <i>CsuA/B</i> |
| Biofilm-forming isolates (n=9)      |           |             |             |             |             |                |                    |             |             |             |             |               |
| 32                                  | P4        | +           | +           | +           | +           | +              | +                  | +           | +           | +           | +           | +             |
| 102                                 | P15       | +           | +           | +           | +           | +              | +                  | +           | +           | +           | +           | +             |
| 145                                 | P35       | +           | +           | +           | +           | +              | +                  | +           | +           | +           | +           | +             |
| 154                                 | P41       | +           | +           | +           | +           | +              | +                  | +           | +           | +           | +           | +             |
| 156                                 | P43       | +           | +           | -           | -           | +              | +                  | +           | +           | +           | +           | +             |
| 160                                 | P46       | +           | +           | -           | -           | +              | +                  | +           | +           | +           | +           | +             |
| 171                                 | P56       | +           | +           | +           | +           | +              | +                  | +           | +           | +           | +           | +             |
| 177                                 | P60       | +           | +           | +           | +           | +              | +                  | +           | +           | +           | +           | +             |
| 181                                 | P61       | +           | +           | +           | +           | +              | +                  | +           | +           | +           | +           | +             |
| Total, no. (%)                      |           | 9 (100%)    | 9 (100%)    | 7(77.8%)    | 7(77.8%)    | 9 (100%)       | 9 (100%)           | 9 (100%)    | 9 (100%)    | 9 (100%)    | 9 (100%)    | 9 (100%)      |
| Non-biofilm-forming isolates (n=30) |           |             |             |             |             |                |                    |             |             |             |             |               |
| 3                                   | P1        | +           | +           | +           | +           | +              | +                  | +           | +           | +           | +           | +             |
| 6                                   | P2        | +           | +           | +           | +           | +              | +                  | +           | +           | +           | +           | +             |
| 21                                  | P4        | +           | +           | +           | +           | +              | +                  | +           | +           | +           | +           | +             |
| 49                                  | P5        | +           | +           | +           | +           | +              | +                  | +           | +           | +           | +           | +             |
| 74                                  | P6        | +           | +           | +           | +           | +              | +                  | +           | +           | +           | +           | +             |
| 83                                  | P7        | +           | +           | +           | +           | +              | +                  | +           | +           | +           | +           | +             |
| 90                                  | P9        | +           | +           | +           | +           | +              | +                  | +           | +           | +           | +           | +             |
| 94                                  | P12       | +           | +           | +           | +           | +              | +                  | +           | +           | +           | +           | +             |
| 100                                 | P14       | +           | +           | +           | +           | +              | -                  | -           | -           | -           | -           | -             |
| 103                                 | P15       | +           | +           | +           | +           | +              | +                  | +           | +           | +           | +           | +             |
| 105                                 | P16       | +           | +           | +           | +           | +              | +                  | +           | +           | +           | +           | +             |
| 107                                 | P17       | +           | +           | +           | +           | +              | +                  | +           | +           | +           | +           | +             |

|                |     |        |        |         |         |           |        |        |       |       |       |       |       |
|----------------|-----|--------|--------|---------|---------|-----------|--------|--------|-------|-------|-------|-------|-------|
| 114            | P20 | +      | +      | +       | +       | +         | +      | +      | +     | +     | +     | +     | +     |
| 124            | P23 | +      | +      | +       | +       | +         | +      | +      | +     | +     | +     | +     | +     |
| 129            | P25 | +      | +      | -       | -       | +         | -      | -      | +     | +     | +     | +     | +     |
| 131            | P26 | +      | +      | +       | +       | +         | +      | +      | +     | +     | +     | +     | +     |
| 133            | P28 | +      | +      | -       | +       | +         | +      | +      | +     | +     | +     | +     | +     |
| 135            | P29 | +      | +      | +       | +       | +         | -      | -      | -     | -     | -     | -     | -     |
| 140            | P33 | +      | +      | +       | +       | +         | +      | +      | +     | +     | +     | +     | +     |
| 142            | P34 | +      | +      | +       | +       | +         | +      | +      | +     | +     | +     | +     | +     |
| 144            | P35 | +      | +      | +       | +       | +         | +      | +      | +     | +     | +     | +     | +     |
| 152            | P40 | +      | +      | +       | +       | +         | +      | +      | +     | +     | +     | +     | +     |
| 158            | P45 | +      | +      | +       | +       | +         | +      | +      | +     | +     | +     | +     | +     |
| 161            | P47 | +      | +      | +       | +       | +         | +      | +      | +     | +     | +     | +     | +     |
| 164            | P50 | +      | +      | +       | +       | +         | +      | +      | +     | +     | +     | +     | +     |
| 166            | P52 | +      | +      | +       | +       | +         | +      | +      | +     | +     | +     | +     | +     |
| 170            | P55 | +      | +      | +       | +       | +         | +      | +      | +     | +     | +     | +     | +     |
| 182            | P62 | +      | +      | +       | +       | +         | +      | -      | +     | +     | +     | +     | +     |
| 186            | P64 | +      | +      | +       | +       | +         | -      | -      | -     | -     | -     | -     | -     |
| 187            | P65 | +      | +      | +       | +       | +         | +      | +      | +     | +     | +     | +     | +     |
| Total, no. (%) |     | 30     | 30     | 28      | 29      | 30 (100%) | 26     | 26     | 27    | 27    | 27    | 27    | 27    |
|                |     | (100%) | (100%) | (93.3%) | (96.7%) |           | (86.7) | (86.7) | (90%) | (90%) | (90%) | (90%) | (90%) |

**Supplementary Fig S1. Pulsed-field gel electrophoresis of 190 isolates of *Acinetobacter baumannii* showed two major clones, pulsotype P4 and P5. BF = biofilm-formation, NBF = non-biofilm-formation.**

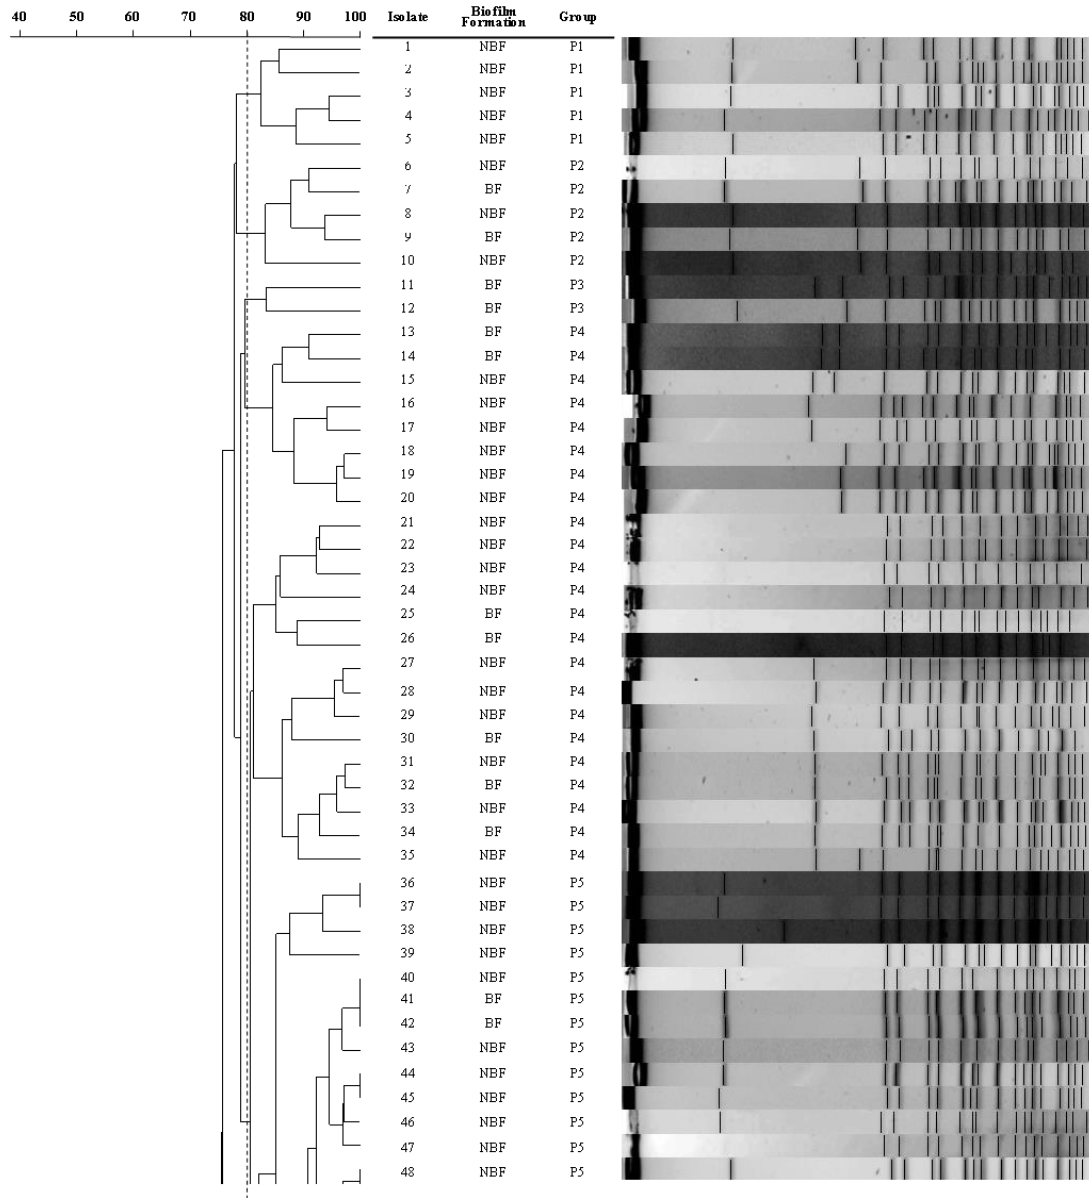

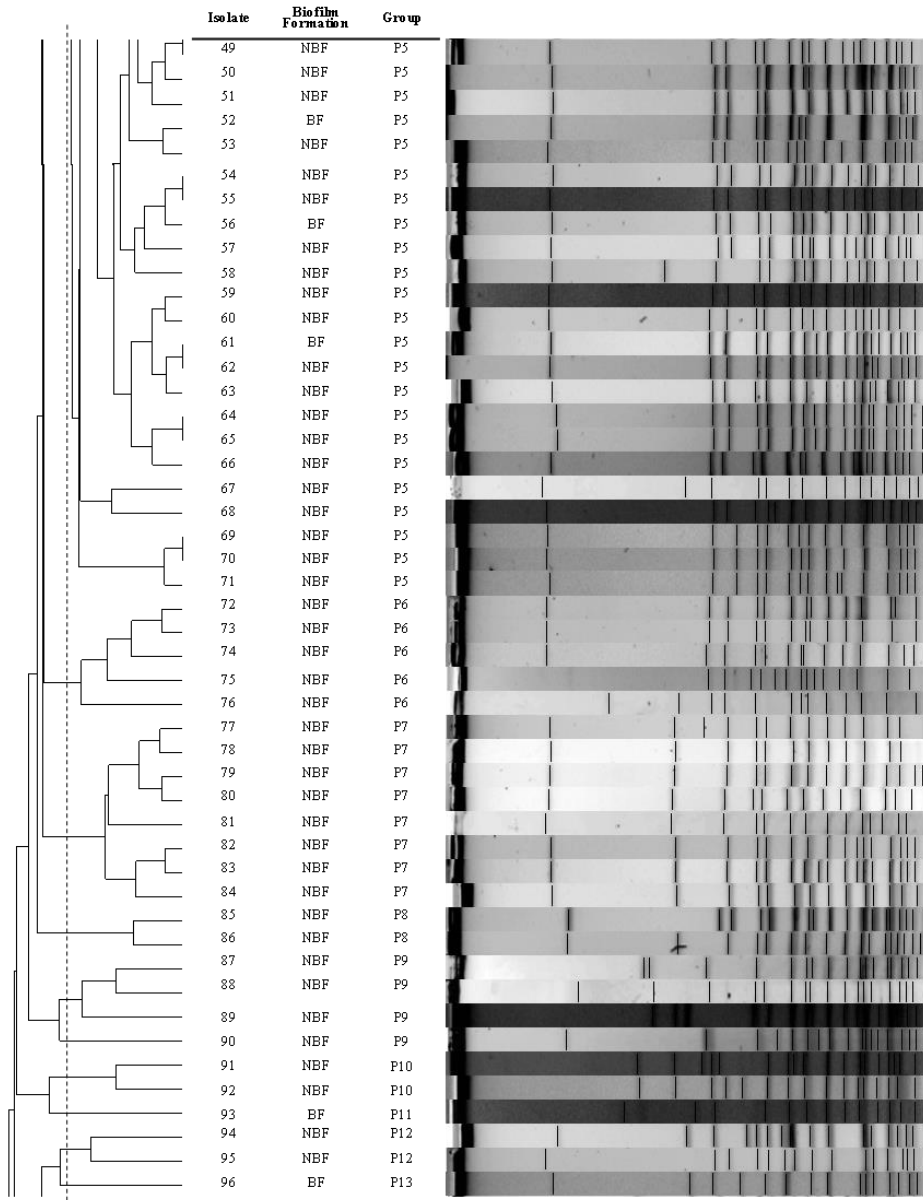



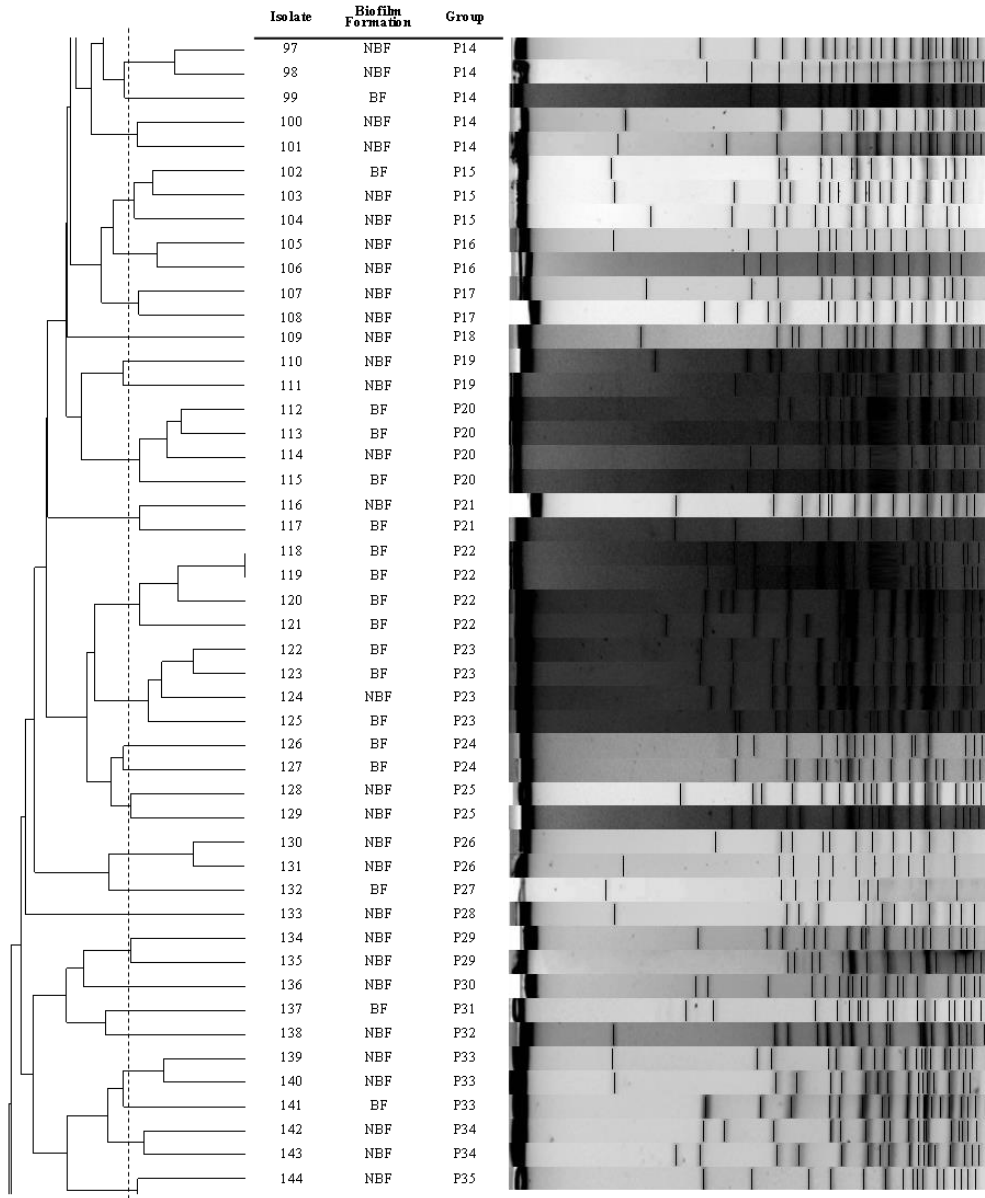

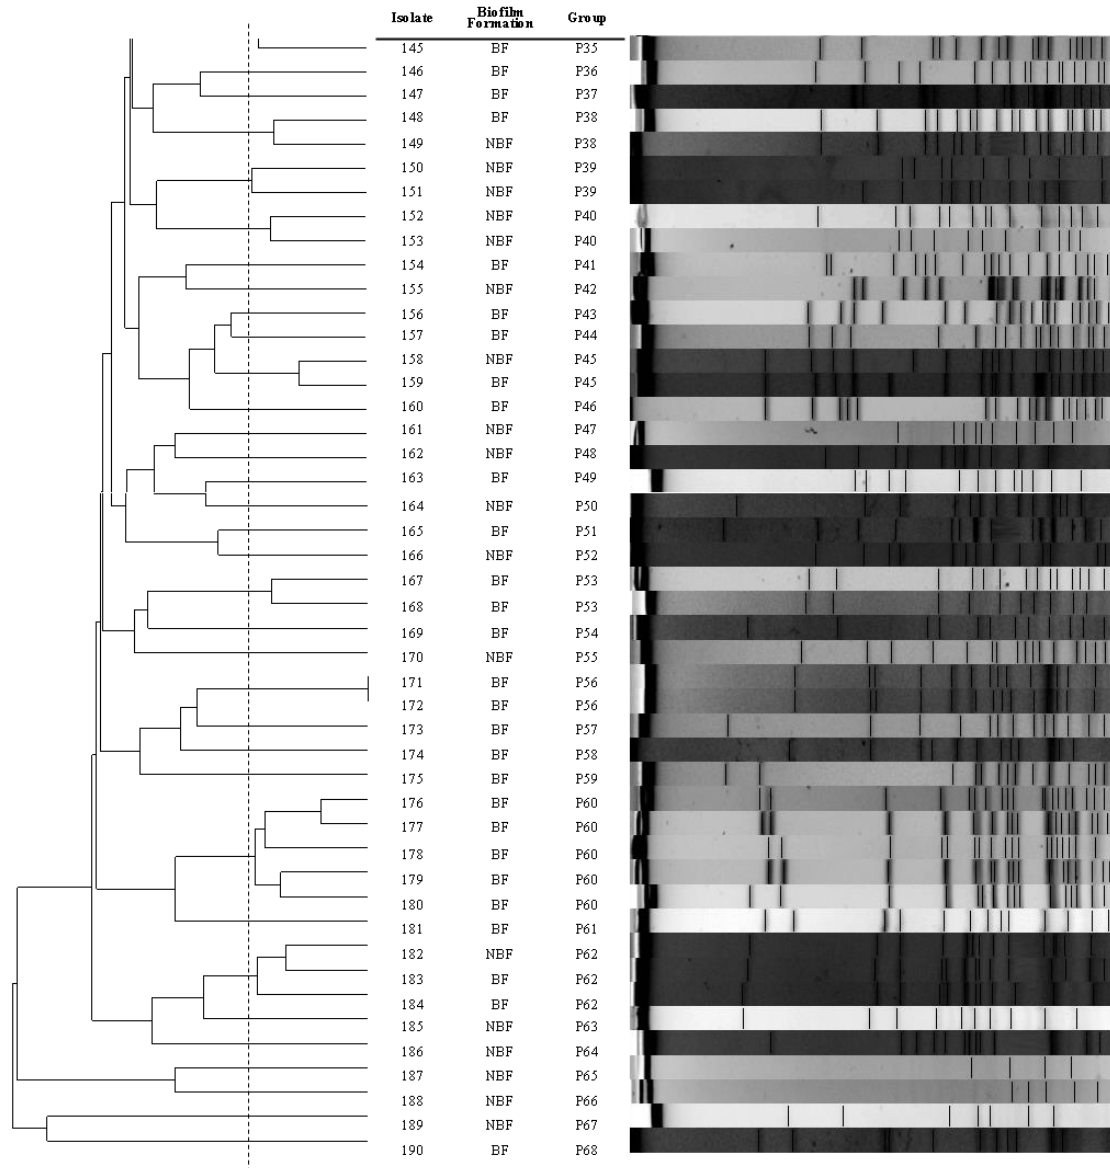

**Supplementary Fig S2. Carbapenem-resistant transformants harboring various carbapenemase genes produced less biofilm at 48 h than the *Acinetobacter baumannii* ATCC 15151(Ab15151) carrying an empty vector.**

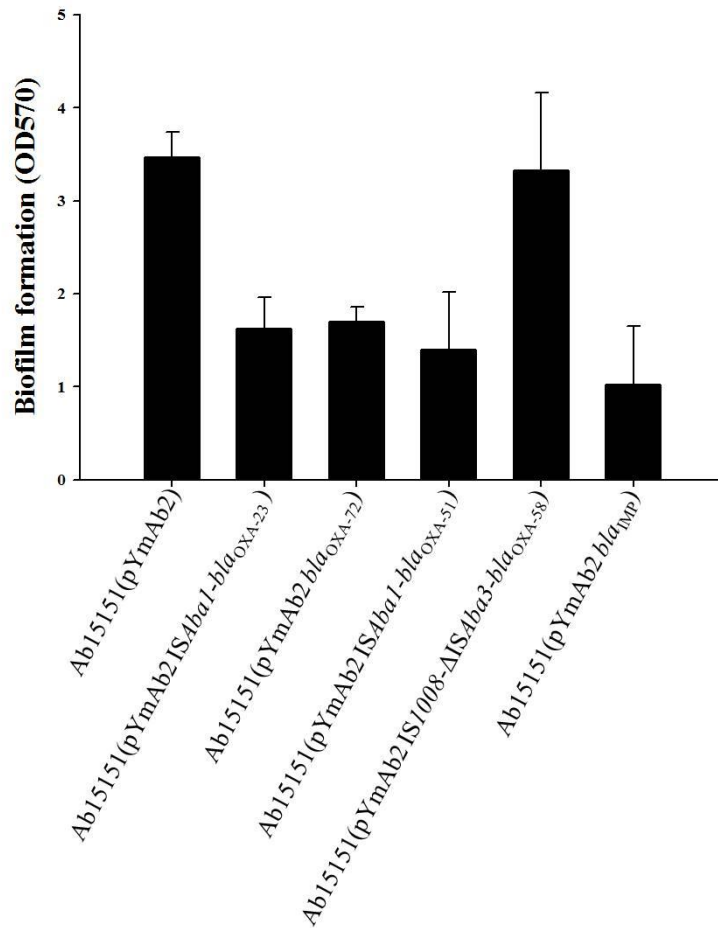

**Supplementary Fig S3. Quantitative reverse transcription polymerase chain reaction (qRT-PCR) showed that the expression levels of (a)-(b) *bap1* [fold change 1.99 and 1.73, respectively], (c)-(d) *abaI* [fold change 2.01 and 1.52, respectively], and (e)-(f) *csu A/B* [fold change 8.2 and 5.42, respectively] were higher in the biofilm-forming isolates (isolates 32 and isolates 42) than in the matched non-biofilm-forming isolates (isolates 81 and isolates 84).**

**(a) *bap1***

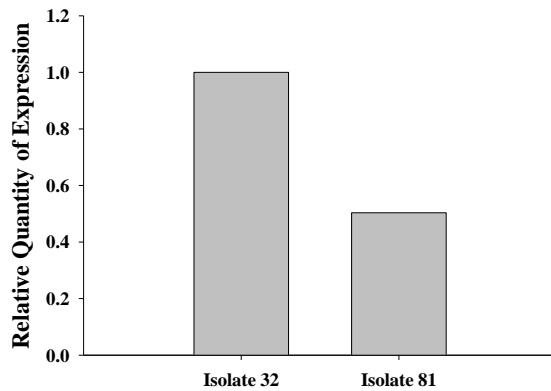

**(b) *bap1***

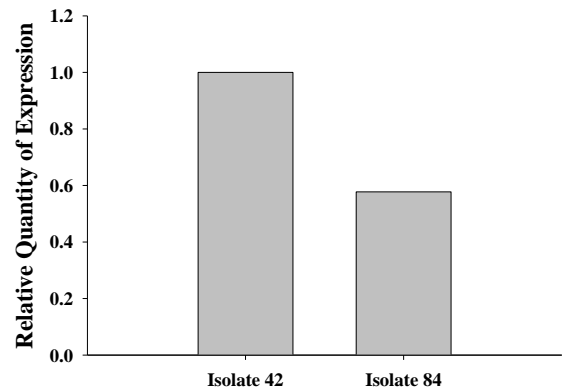

**(c) *abaI***

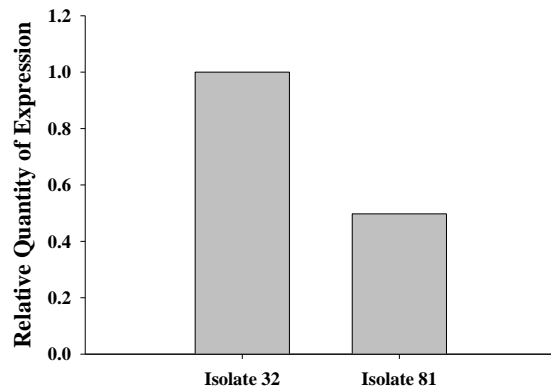

**(d) *abaI***

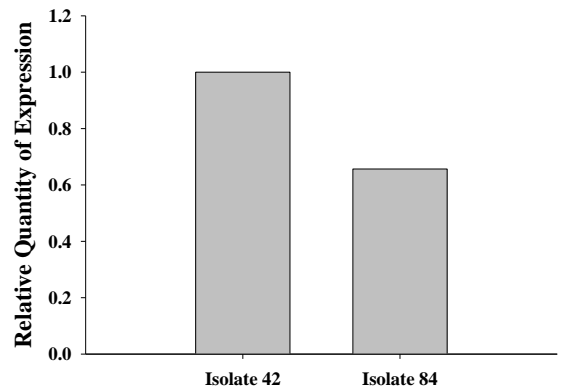

**(e) *csuA/B***

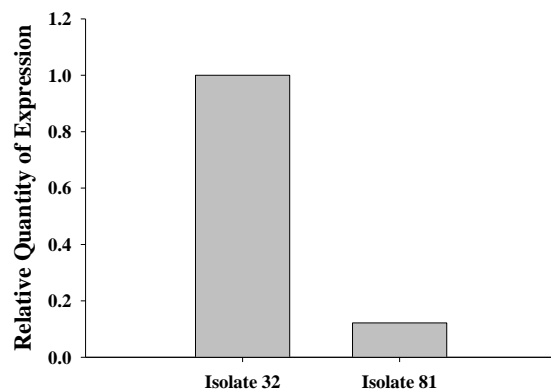

**(f) *csuA/B***

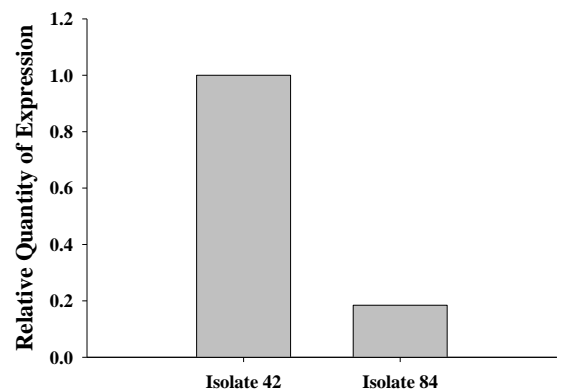

Supplement: 41598_2018_25661_MOESM1_ESM.pdf [file 41598_2018_25661_MOESM1_ESM.pdf]
